# Supplementary material
Source: Springer Nature journal article supplement (https://www.springermedizin.de/resource/supplementary/13063_2013_1466_MOESM1_ESM.pdf/9620072)
Supplement: MOESM1 [file 9620072]

# ADAPT CONSORT Flow Diagram

## Enrollment

**Diagnosis of histologically confirmed unilateral primary invasive carcinoma of the breast**

Diagnostic core biopsy and local pathology assessment (hormone receptor & HER2 status)

### Excluded

- Not meeting eligibility criteria
- Declined to participate
- Other reasons

## Allocation

**ADAPT HR+/HER2-**

**ADAPT HER2+/HR+**

**ADAPT HER2+/HR-**

**ADAPT Triple Negative**

3 weeks induction treatment

Central pathology review of diagnostic core biopsy (hormone receptor & HER2 status)

**Efficacy assessment**

Repeat core biopsy\*/surgery\*\*

## Randomization

### Excluded

- Screening failure

**Risk assessment**

**Randomization**

N0-1

N2-3

3 weeks induction treatment

Arm A

Arm B

Arm C

Arm A

Arm B

Arm A

Arm B

RS $\leq$ 11 or RS12-25 and response

RS $\geq$ 26 or RS12-25 and low response

Repeat core biopsy

Arm A

Arm B

Arm C

Arm A

Arm B

Arm A

Arm B

Endocrine therapy (ET)

**Randomization**

Arm A

Arm B

Pathologic complete response (pCR) assessment

## End of treatment

Surgery\*

Surgery

## Follow-Up

Completed follow-up protocol  
Discontinued treatment  
Lost to follow-up

**ADAPT HR+/HER2-**

ET

Arm A

Arm B

**ADAPT HER2+/HR+**

Arm A

Arm B

Arm C

**ADAPT HER2+/HR-**

Arm A

Arm B

**ADAPT Triple Negative**

Arm A

Arm B

## Analysis

Analysed  
Excluded from analysis

**ADAPT HR+/HER2-**

ET

Arm A

Arm B

**ADAPT HER2+/HR+**

Arm A

Arm B

Arm C

**ADAPT HER2+/HR-**

Arm A

Arm B

**ADAPT Triple Negative**

Arm A

Arm B
